# Supplementary material
Source: PubMed Central journal article supplement (PMC3113485)
Supplement: NIHMS103468-supplement-Figure_legend.pdf [file NIHMS103468-supplement-Figure_legend.pdf]

## **Legend of Supplemental Figure 1.**

### **Reconstitution of radiation chimera with liver cells derived from Lsh<sup>-/-</sup>p53<sup>-/-</sup> embryos**

- a. Survival curve of mice transplanted with fetal liver cells derived from Lsh<sup>-/-</sup>p53<sup>-/-</sup> (n=43) and Lsh<sup>+/+</sup>p53<sup>-/-</sup> (n=46) embryos.
- b. Leukocytes counts in peripheral blood. Each dot represents an individual animal.
- c. Hematocrit analysis of peripheral blood from mice receiving Lsh<sup>-/-</sup> or Lsh<sup>+/+</sup> donor cells. The P value (\*\*) was not significant for day 41.
- d. Reduced engraftment efficiency in Lsh<sup>-/-</sup>p53<sup>-/-</sup> fetal liver transplanted mice as determined by CD45.1<sup>+</sup> and CD45.2<sup>+</sup> FACS analysis.
- e. FACS analysis of bone marrow of reconstituted animals using distinct antibodies against the indicated cell surface antigens Mac1, GR1, transferrin receptor (Trans), TER119 (Ter), IgM and B220.
