# Supplementary material
Source: PubMed Central journal article supplement (PMC3113485)
Supplement: NIHMS103468-supplement-Table_1.pdf [file NIHMS103468-supplement-Table_1.pdf]

**Supplemental Table 1****PCR primers used for methylation sensitive PCR analysis (MS-PCR), RT-PCR,****bisulphite sequencing analysis and ChIPs analysis.**

|                          |                                                                                      |
|--------------------------|--------------------------------------------------------------------------------------|
| ERVL MS-PCR              | 5'-AAACAAGCTCTCAATGCCGTA-3'<br>5'-AGGGCTCTGAAAGGACAGGT-3'                            |
| 5'MaLR MS-PCR            | 5'-TAACCCAAGACACCGTGGAT-3'<br>5'-CTCTGAGGATCTGCCCTGAC-3'                             |
| 3'MaLR MS-PCR            | 5'-GTCCGTCTGTCCGTCTGTCT-3'<br>5'-TGCGTAGCCTTTGTGAGTGT-3'                             |
| PU.1 RT-PCR              | 5'-ATGGAAGGGTTTTCCCTCAC-3'<br>5'-AAGCCATCAGCTTCTCCATC-3'                             |
| ERVL RT-PCR              | 5'-CCAACACGATGCTCACAGTT-3'<br>5'-AAGCCTGCCAGGTAGTGGT-3'                              |
| MaLR RT-PCR              | 5'-GGTCAGGAGAGGTTTTGAAG-3'<br>5'-CATAGACAGACGGACAGACG-3'                             |
| IAP RT-PCR               | 5'-GAAGCGGTGAATCCTCC-3'<br>5'-TCCTTCAAAGACCGGAAATGC-3'                               |
| Actin RT-PCR             | 5'-GGCCCAGAGCAAGAGAGGTAT-3'<br>5'-ACGCACGATTTCCCTCTCAGC-3'                           |
| PU.1 promoter bisulphite | 5'-TTATTAGAGGGGATTGAGAAGA AAT-<br>3' and 5'-ACATCCAATAAAA<br>CTCCAAATTAATC-3'        |
| ERVL/MaLR bisulphite     | 5'-GGTGATATTTGTAGTAAGTTTGTGGTAT<br>AT-3' and 5'-AATCATAAAACAATAAAA<br>AAATACTTTCA-3' |
| PU.1 promoter ChIPs      | 5'-GATCCACGCTCTCGCTATTC-3'<br>5'-GCCAGCACAAGTTCCTGATT-3'                             |
| ERVL ChIPs               | 5'-GTGTGTGCCACCACTACCTG-3'<br>5'-ACAACCTCCACACAGCACAGC-3'                            |
| MaLR ChIPs               | 5'-AGGGCAGATCCTCAGAGCTT-3'<br>5'-GAGTGTGTGCACATGCAGAAG-3'                            |
| Actin ChIPs              | 5'-CTCAAACAAGAGGCCACACA-3'<br>5'-ATGAAGAGTTTTGGCGATGG-3'                             |
| Major satellite ChIPs    | 5'-GCGAGAAAACCTGAAAATCACG-3'<br>5'-CTTGCCATATTCCACGTCCT-3'                           |
