# Supplementary material
Source: PubMed Central journal article supplement (PMC3113485)

# Supplemental Figure 1

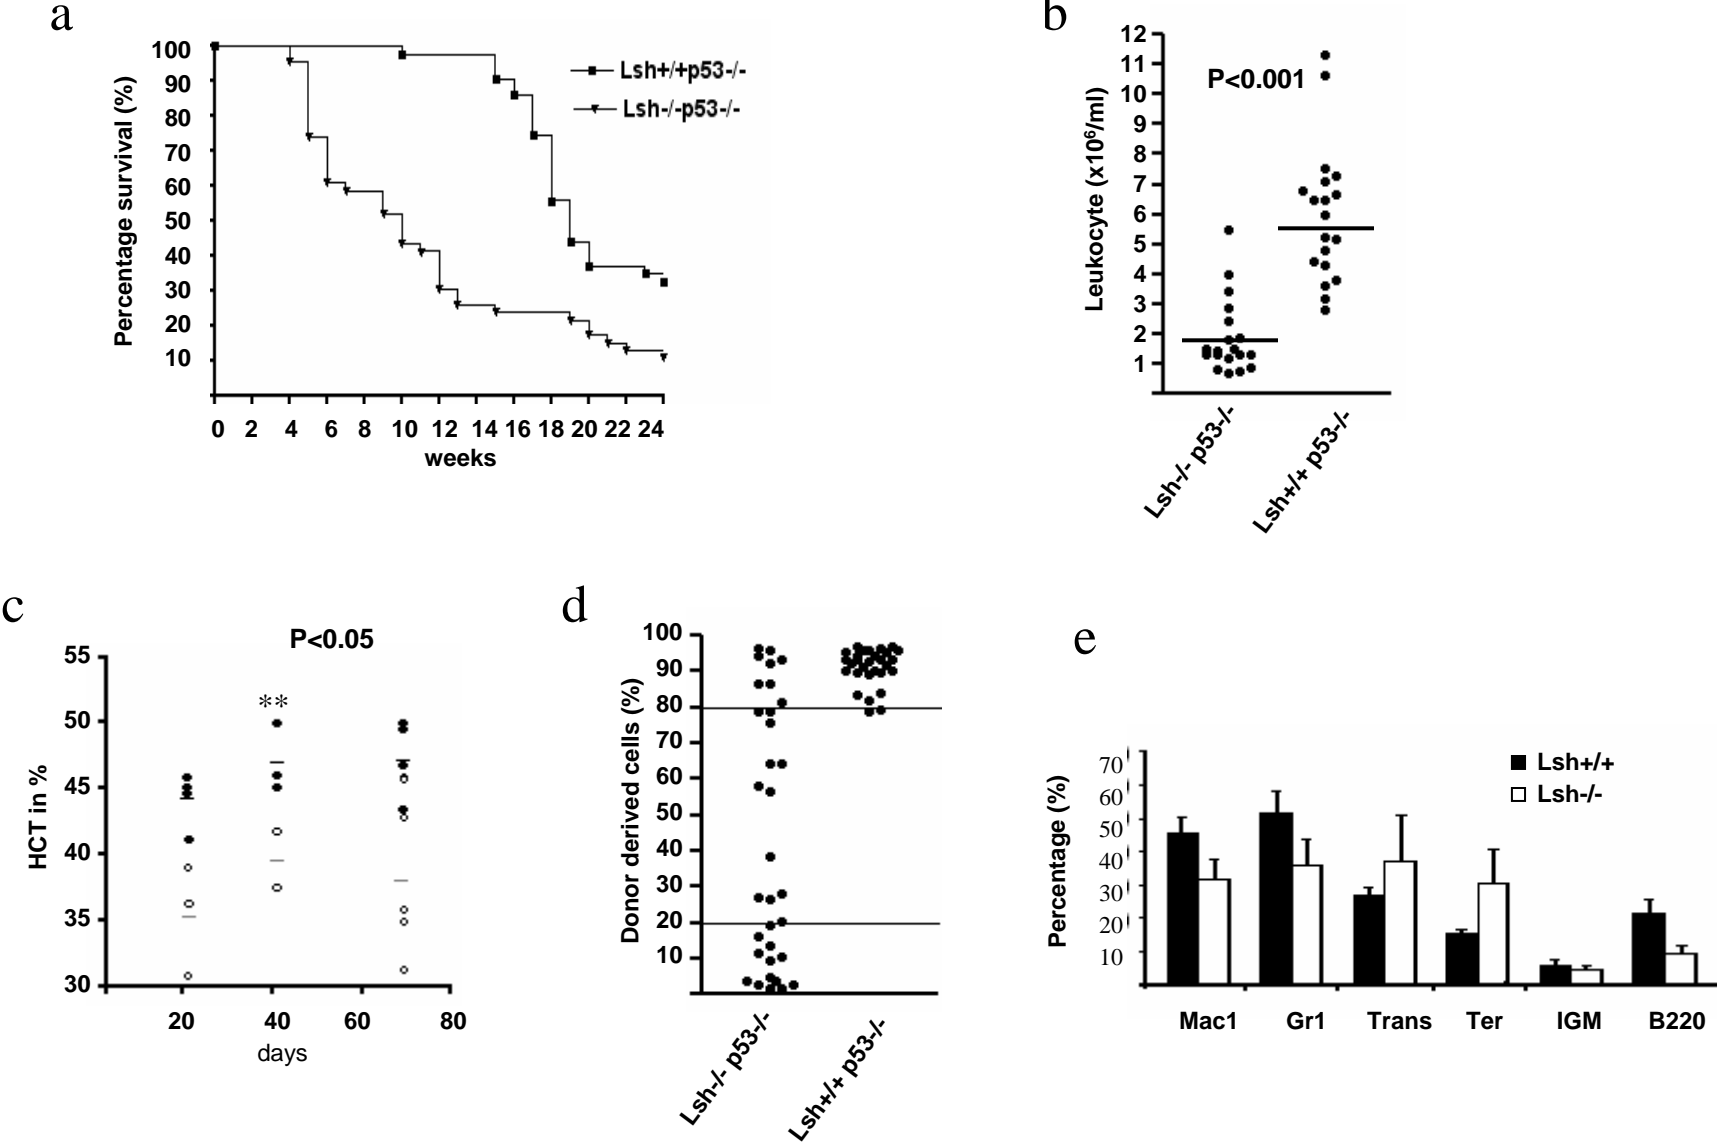

Supplement: NIHMS103468-supplement-Figure_1A.pdf [file NIHMS103468-supplement-Figure_1A.pdf]
